# Supplementary material
Source: HighWire-hosted journal article supplement (https://gh.bmj.com/content/3/4/e000809)
Supplement: inline-supplementary-material-1 [file inline-supplementary-material-1.pdf]

## Appendix

**Table A Overview of project activities**

| Timing   | Project activity                                                          | Description of inputs                                                                                                                                                                                                                                                                                                                                                                                                                                                                               | Units of input                                                                                                                                                                                                          |
|----------|---------------------------------------------------------------------------|-----------------------------------------------------------------------------------------------------------------------------------------------------------------------------------------------------------------------------------------------------------------------------------------------------------------------------------------------------------------------------------------------------------------------------------------------------------------------------------------------------|-------------------------------------------------------------------------------------------------------------------------------------------------------------------------------------------------------------------------|
| Start-up | Establishing the NGO                                                      | Fees to set up operations in Ouagadougou and London; staff time dedicated to operations set-up                                                                                                                                                                                                                                                                                                                                                                                                      | 3 FTEs* in Burkina Faso + 9 FTEs in London (including management, operations, finance, administration, programme development, creative director, research)                                                              |
|          | Recruitment of management and administrative teams                        | Advertisements; staff time dedicated to recruitment                                                                                                                                                                                                                                                                                                                                                                                                                                                 |                                                                                                                                                                                                                         |
|          | Project coordination                                                      | Management staff time                                                                                                                                                                                                                                                                                                                                                                                                                                                                               |                                                                                                                                                                                                                         |
|          | General operations                                                        | Office running costs                                                                                                                                                                                                                                                                                                                                                                                                                                                                                |                                                                                                                                                                                                                         |
|          | Recruitment and training of creative team                                 | Advertisements; staff time dedicated to recruitment; staff time and other resources dedicated to training                                                                                                                                                                                                                                                                                                                                                                                           | Training of 13 FTEs in creative team - full-time training for the first two months                                                                                                                                      |
|          | Recruitment and training of formative research and uptake monitoring team | Advertisements; staff time dedicated to recruitment; staff time and other resources dedicated to training                                                                                                                                                                                                                                                                                                                                                                                           | Training of 3 FTEs in research team – one month                                                                                                                                                                         |
|          | Contracting with radio stations                                           | Visiting stations & finding suitable partners, explaining campaign, negotiating prices                                                                                                                                                                                                                                                                                                                                                                                                              | 2 FTEs managing contracting process                                                                                                                                                                                     |
| Running  | Project coordination                                                      | Management staff time and travel                                                                                                                                                                                                                                                                                                                                                                                                                                                                    | 36 FTEs in Burkina Faso + 8 FTEs in London (including management, operations, finance, administration, programme development, creative director, research)                                                              |
|          | General operations                                                        | Office running costs                                                                                                                                                                                                                                                                                                                                                                                                                                                                                |                                                                                                                                                                                                                         |
|          | Formative research and uptake monitoring                                  | Focus groups and in-depth individual interviews in rural villages to test media formats, monitoring of impact of spots/long format shows                                                                                                                                                                                                                                                                                                                                                            | In total around 75 research trips, visiting ~150 villages and interviewing a total of 4,024 people                                                                                                                      |
|          | Spot production cycle                                                     | Writing, editing and initial selection, translation into pre-test languages. recording for pre-test, pre-testing, selecting final spots, translation into all languages, recording final spots in 6 languages                                                                                                                                                                                                                                                                                       | 14 FTEs in creative team + 3 FTEs managers + 2 FTEs support staff                                                                                                                                                       |
|          | Long format show production                                               | Writing, editing and selection of final scripts. Scripts then sent out to radio stations where program teams practise and perform the scripts in local languages. DMI staff time spent training local stations to practise and perform scripts when visiting the radio stations                                                                                                                                                                                                                     |                                                                                                                                                                                                                         |
|          | Support to radio stations                                                 | Capacity building and material support: training (one two-day training for radio station members), mentoring, equipment, CDs, financial support for running cost and contribution to solar power installation at one of the radio stations facing power outages that were affecting programmes                                                                                                                                                                                                      | 4 FTEs supporting the radio stations. Each time was visited approximately 40 times over the three years of the campaign                                                                                                 |
|          | Broadcasting                                                              | Value of airtime, for spots and long format shows (air time value of long format shows applied in sensitivity analysis): Both spots and shows were dominated by prompts for care-seeking in case of illness symptoms in children (spots 48%, shows 31%); followed by messages on nutrition - during pregnancy, of neonates and of infants (spots 22%, shows 20%); hygiene practices (spots 13%, shows 16%); and promotion of antenatal care visits and delivery at facility (spots 11%, shows 12%). | The 7 stations each broadcast 70 minutes per station per week for spots (one distinct spot per week) + 10 hours per station per week for long-format shows (10 different shows per week) throughout the 2.5-year period |

\*FTEs – full time equivalents

**Table B Parameters varied in sensitivity analyses**

|                       | Parameter                                                                                                                  | One-way                                |                                                                      | PSA               |              | Source                  |
|-----------------------|----------------------------------------------------------------------------------------------------------------------------|----------------------------------------|----------------------------------------------------------------------|-------------------|--------------|-------------------------|
|                       |                                                                                                                            | Base case (low, high)                  | Range interval                                                       | Mean (SD)         | Distribution |                         |
| <b>Outcomes</b>       | Under five mortality impact (modelled in LiST based on incremental health facility utilisation)                            | 2,967(1,110-5,741)                     | 95% CI of LiST model input values (facility consultations)           | 2,967 (1,181)     | Gaussian     | 1                       |
| <b>Costs</b>          | Incremental number of consultation children under five (linked to child mortality impact (above) and cost of care-seeking) | under fives: 376,979 (141,766-644,757) | 95% CI                                                               | 375,242 (140,217) | Gaussian     | 2,3                     |
|                       | Incremental number of consultation antenatal care (linked to child mortality impact (above) and cost of care-seeking)      | antenatal care: 29,619 (1,120-60,446)  | 95% CI                                                               | 29,520 (15,061)   | Gaussian     |                         |
|                       | Incremental number of facility childbirths (linked to child mortality impact (above) and cost of care-seeking)             | childbirth: 17,189 (6,460-28,398)      | 95% CI                                                               | 17,244 (5,599)    | Gaussian     |                         |
|                       | Household unit cost of care-seeking children under five (2015 USD)                                                         | under fives: 3.25 (0-7.63)             | 10 <sup>th</sup> -90 <sup>th</sup> percentile                        | 3.25 (4.46)       | Gamma        | Baseline survey         |
|                       | Household unit cost of care-seeking for antenatal care (2015 USD)                                                          | antenatal care: 2.40 (0-5.61)          | 10 <sup>th</sup> -90 <sup>th</sup> percentile                        | 2.40 (5.98)       | Gamma        |                         |
|                       | Household unit cost of care-seeking for childbirth (2015 USD)                                                              | childbirth: 5.84 (0-13.47)             | 10 <sup>th</sup> -90 <sup>th</sup> percentile                        | 5.84 (8.56)       | Gamma        |                         |
|                       | Provider costs (2015 USD)                                                                                                  | 7,749,128 (4,944,445-n/a)              | Inclusion or not of international office costs: 100% (64%-n/a)       | n/a               | n/a          | NGO accounts            |
|                       | Airtime cost (2015 USD)                                                                                                    | 213,647 (0-1,831,277)                  | Spots only (No airtime value included – Spots and long format shows) | n/a               | n/a          | Campaign radio stations |
| <b>Discount rates</b> | Discount rate costs                                                                                                        | 3% (0-6%)                              | Standard practice in economic evaluation                             | n/a               | n/a          | 4                       |
|                       | Discount rate LYS                                                                                                          | 3% (0-6%)                              | Standard practice in economic evaluation                             | n/a               | n/a          |                         |

**Table C Country indicators for scale-up analysis<sup>5-7</sup>**

|                                                                            | Burkina Faso | Burundi  | Niger | Malawi | Mozambique |
|----------------------------------------------------------------------------|--------------|----------|-------|--------|------------|
| <b>Population</b>                                                          |              |          |       |        |            |
| Total population (million) 2015                                            | 18.1         | 11.2     | 19.9  | 17.2   | 28.0       |
| Population residing in rural areas (%) 2015                                | 70           | 88       | 81    | 84     | 68         |
| <b>Media</b>                                                               |              |          |       |        |            |
| Media structure                                                            | Localised    | National | Mixed | Mixed  | Mixed      |
| TV penetration                                                             | Low          | Medium   | Low   | Low    | Medium     |
| Radio penetration                                                          | Medium       | High     | Low   | High   | Medium     |
| Cost of airtime                                                            | Low          | Medium   | Low   | Medium | High       |
| <b>Health</b>                                                              |              |          |       |        |            |
| Fertility rate (births per woman) 2015                                     | 5.4          | 5.9      | 7.6   | 5.0    | 5.3        |
| Maternal mortality rate (per 100,000 live births) 2015                     | 371          | 712      | 553   | 634    | 489        |
| Neonatal mortality rate (per 1000 live births) (2013)                      | 27           | 29       | 27    | 22     | 27         |
| Under-five mortality rate (per 1000 live births) (2013)                    | 89           | 82       | 96    | 64     | 79         |
| <b>Economic indicators</b>                                                 |              |          |       |        |            |
| Total health care expenditure (THE) per capita (International \$ PPP) 2014 | 82           | 58       | 54    | 93     | 79         |
| Government expenditure (%) as a share of THE 2014                          | 52%          | 53%      | 55%   | 53%    | 56%        |
| Out-of-pocket expenditure (%) as a share of THE 2014                       | 39%          | 21%      | 34%   | 11%    | 9%         |
| GDP per capita (PPP Int. \$) 2015                                          | 1,700        | 797      | 963   | 1,159  | 1,191      |

**Table D Media adjustments made for each scale-up country scenario**

| Scale-up country | Media penetration (among women) | Data source | Adjustment applied to impact modelling* |
|------------------|---------------------------------|-------------|-----------------------------------------|
| Burkina Faso     | 45.2% weekly radio listening    | DHS 2010    | -13%                                    |
| Burundi          | 57.9% weekly radio listening    | DHS 2010    | +12%                                    |
| Niger            | 36.2% weekly radio listening    | DHS 2012    | -30%                                    |
| Malawi           | 57.3% weekly radio listening    | DHS 2010    | +10%                                    |
| Mozambique       | 60.0% weekly radio listening†   | DHS2011     | +15%                                    |

\* The mortality outcomes generated by the LiST modelling was adjusted using the figure for female radio listening in Burkina Faso (52% as measured by the RCT endline survey) as a linear index.

† There are huge discrepancies between the two most recent estimates for female radio listening in national surveys conducted in Mozambique: 42.5% in the 2011 DHS, 78% in the 2009 AIS. We have no reason to believe radio listening in Mozambique really did change that much between these two surveys and suspect this vast difference is a result of seasonal variation in the time the surveys were conducted. We have therefore take the midpoint of these two figures.

**Table E Assumptions and methods in base-case and scale-up analyses**

|                                                               | Within-trial analysis 2012-2015   | National scale-up scenario Burkina Faso                                      | Prospective country scale-ups scenarios 2018-2020                                    |
|---------------------------------------------------------------|-----------------------------------|------------------------------------------------------------------------------|--------------------------------------------------------------------------------------|
| <b>Costing perspective</b>                                    | Societal                          | Societal                                                                     | Provider                                                                             |
| <b>Time period</b>                                            | 2012 March-2015 January           | 2012-2014                                                                    | 2018-2020                                                                            |
| <b>Mass media format</b>                                      | Radio spots and long format shows | Radio spots only (10% reduction of impact assumed without long format shows) | Radio (or TV) spots only (10% reduction of impact assumed without long format shows) |
| <b>Media penetration</b>                                      | 52%                               | 45%                                                                          | 45-60% (table C)                                                                     |
| <b>Share of total cost, international (London) NGO office</b> | 38%                               | 9%                                                                           | 9%                                                                                   |
| <b>Number of staff running the programme (FTEs)</b>           | 44                                | 14                                                                           | 14-35                                                                                |

**Table F Start-up costs (Dec 2010 – Jan 2012) by activity (2015 USD)**

|                                                                    | FINANCIAL          | ECONOMIC           |
|--------------------------------------------------------------------|--------------------|--------------------|
|                                                                    | Start-up costs (%) | Start-up costs (%) |
| Setting up the Burkina Faso office                                 | 15,651 (1%)        | 15,651 (1%)        |
| Project coordination                                               | 175,004 (16%)      | 175,004 (15%)      |
| General administration                                             | 604,337 (54%)      | 604,548 (54%)      |
| Recruitment of management and administrative personnel             | 198,403 (18%)      | 198,403 (18%)      |
| Recruitment of creative team                                       | 20,629 (2%)        | 20,629 (2%)        |
| Recruitment and training of formative research and monitoring team | 60,949 (5%)        | 60,949 (5%)        |
| Contracting with radio stations                                    | 51,927 (5%)        | 51,927 (5%)        |
| <b>Total start up costs</b>                                        | <b>1,126,900</b>   | <b>1,127,111*</b>  |

*\*Differs slightly from the economic start-up costs in table 2 in the manuscript and in table F below since these are not annualised*

**Table G Annualised running costs by input category (2015 USD)**

|                                       | FINANCIAL                        |                                         | ECONOMIC                         |                                         |
|---------------------------------------|----------------------------------|-----------------------------------------|----------------------------------|-----------------------------------------|
|                                       | Total cost over study period (%) | Annual costs, average over study period | Total cost over study period (%) | Annual costs, average over study period |
| <b>Recurring costs</b>                |                                  |                                         |                                  |                                         |
| Personnel                             | 4,287,060 (58%)                  | 1,429,020                               | 4,287,060 (56%)                  | 1,429,020                               |
| Travel                                | 726,692 (10%)                    | 242,231                                 | 726,692 (9%)                     | 242,231                                 |
| Supplies (incl communication costs)   | 767,371 (10%)                    | 255,790                                 | 767,371 (10%)                    | 255,790                                 |
| Rent and utilities                    | 329,839 (4%)                     | 109,946                                 | 329,839 (4%)                     | 109,946                                 |
| Air time                              | 0                                | 0                                       | 213,649 (3%)                     | 71,216                                  |
| <b>Total recurring costs</b>          | <b>6,110,963 (82%)</b>           | <b>2,036,988</b>                        | <b>6,324,612 (82%)</b>           | <b>2,108,204</b>                        |
| <b>Capital costs</b>                  |                                  |                                         |                                  |                                         |
| Radio station equipment               | 59,989 (1%)                      | 19,996                                  | 63,626 (1%)                      | 21,209                                  |
| NGO office/media production equipment | 147,541 (2%)                     | 55,846                                  | 114,068 (1%)                     | 59,231                                  |
| Vehicles                              | 42,208 (1%)                      | 14,069                                  | 49,314 (1%)                      | 16,438                                  |
| <b>Total capital costs</b>            | <b>209,745 (3%)</b>              | <b>69,915</b>                           | <b>227,008 (2%)</b>              | <b>75,669</b>                           |
| <b>TOTAL RUNNING COSTS</b>            | <b>6,320,707 (85%)</b>           | <b>2,106,902</b>                        | <b>6,478,322 (84%)</b>           | <b>2,183,873</b>                        |
| Start-up costs                        | 1,126,900 (15%)                  | 375,633                                 | 1,197,508 (16%)                  | 399,169                                 |
| <b>TOTAL COSTS</b>                    | <b>7,447,608</b>                 | <b>2,482,536</b>                        | <b>7,749,128</b>                 | <b>2,583,043</b>                        |

**Figure A Cost-effectiveness plane showing the statistical uncertainty around cost and DALYs in the cluster-randomised trial**

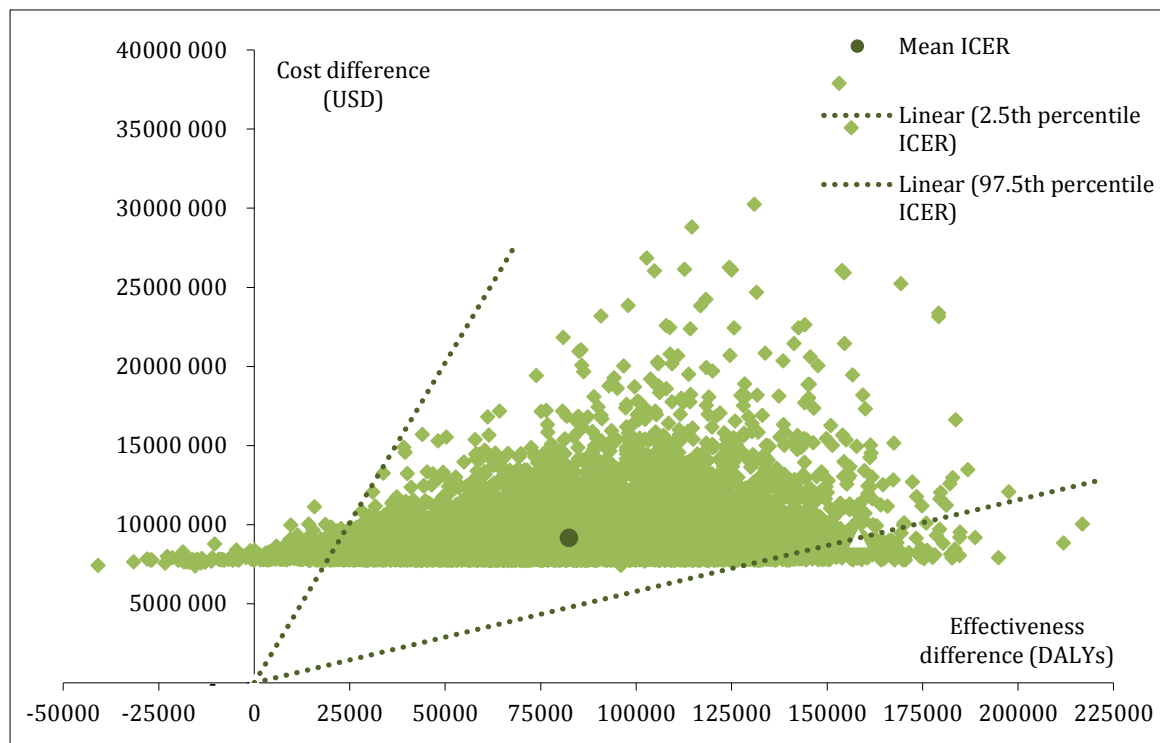

The plotted results of the probabilistic sensitivity analysis illustrate its distribution in a cost-effectiveness plan, with 10,000 dots each representing the results of one of the simulations. The scatter-plot is cut off at the level of the provider cost of the campaign - as these were the measured costs occurred they were not varied in the within-trial analysis. The larger plot represents the median ICER in the simulation, USD 111. The 2.5<sup>th</sup> and 97.5<sup>th</sup> percentiles of the ICER are pictured as dashed lines. Ninety-five percent confidence intervals were calculated through a bootstrap with 1,000 times 1,000 iterations resulting in a 95% CI of \$-38-320 around the mean value of the PSA (\$153).

## References

1. Murray J, Head R, Remes P, et al. Estimating the effect of a mass radio campaign on child mortality in Burkina Faso using the Lives Saved Tool (LiST): modelling from a repeated cross sectional cluster randomised trial. *[In review]* 2017.
2. Annuaire Statistique 2011: Burkina Faso Ministère de la Santé, Secrétariat Général, Direction Générale de l'information et des Statistiques Sanitaires, 2012.
3. Sarrassat S, Meda N, Badolo H, et al. Effect of a mass radio campaign on family behaviours and child survival in Burkina Faso: a repeated cross-sectional, cluster-randomised trial. *Lancet Glob Health* 2018; **6**(3): e330-e41.
4. Tan-Torres Edejer T, Baltussen R, Adan T, et al. WHO Guide to Cost-effectiveness Analysis. Geneva, Switzerland, 2003.
5. UNICEF. The State of The World's Children 2016 Country Statistical Information. 2016.
6. WHO. Global Health Observatory. 2016.
7. World\_Bank. World Bank Open Data. 2016.
